# Supplementary material for: Oocyte Selection for <em>in vitro</em> embryo Production in Bovine Species: Non-Invasive Approaches for the New Challenges of Oocyte Competence
Source: Preprints.org preprint supplement (doi:10.20944/preprints202010.0453.v2), 2020-11-17
Supplement: Supplementary file 1 [file supplementary]

## Sheet: Table 1
	Reference	Criteria	Recommendation
	Smith, L.C et al 1996; de Wit et. al 2000; Chian et. al 2002	Ovarian morphology	Presence of cycle-related structures
	Blondin et. al 1995; Iwata et. al 20004; Lequarre et. al 2005, Caixeta et. al 2009;	Follicle size	> 5 mm
	de Wit et. al 2000, Bilodeau-Goeseels et al 2002; Emanuelli et. al 2019	Morphology of the cumulus‐oocyte complexes	COCs with at least five layers of CC, compact and/or slightly expanded cumulus, with or without dark spots in the oocyte and cumulus
	Hawk et. al 1994; Nagano et. al 2006, Jeong et. al 2009;	Lipid content	dark ooplasm indicates high competence, light-colored indicates lacking lipids and poor competence, and black ooplasm indicates aging
	Choi et. al 2001; Anchordoquy et. al 2016; Dovolou et. al 2014, Rosa et. al 2016	Cumulus expansion and oocyte size	Do not associated to oocyte quality. Important role in fertilization
	Fair et. al 1995; Otoi et al. 1997; Arlotto et al. 1996; Anguita et.al 2007	Oocyte size	Diameters >115 and < 130 microns
	Hu et . Al 2015; Ebner et.al 2000; Ebner et.al 2002; Zhou et. al 2016	First polar body (PB1) morphology	PB1 of a homogeneous, round shape, smooth or intact surface
	Rienzi et. al 2003; Lu et. al 2005; Caamaño et. al 2013	Meiotic spindle and zona pellucida birefringence	useful tool for micromanipulation procedures (ICSI-SCNT) and for assessing post-warming integrity of meiotic spindle of vitrified bovine oocytes
	Koester et. al 2001; Held et. al 2012	zona pellucida birefringence (ZPB)	Lower ZPB is related to high quality oocytes and improved blastocyst development
	Opiela et. al 2013; Fakruzzaman et. al 2013, Silva et. al 2013; Mirshamsi et. al 2013; Castaneda et.al 2013	brilliant cresyl blue (BCB) staining	BCB+ oocytes have higher developmental competence than BCB- oocytes

## Sheet: Table 2
Reference	Oocyte stage	Criterion of developmental competence	Technique used	Genes and/or pathway associated to high competence	Genes and/or pathway associated to low competence
TRANSCRIPTOMIC
Dieci et al., 2016	GV	Chromatin compaction, follicle size and BCB staining	qPCR and microarray analysis	GATM (posttranslational modification, amino acid metabolism, and free radical scavenging), MAN1A1 (functional gap junction-mediated COC communication) ZIP8 (Zinc transporter)	ANGPT2 (cell death, apoptosis)
Caixeta et al., 2009	GV	follicle size (1.0-3.0, 3.1-6.0, 6.1-8.0 and >or=8.1 mm)	qPCR	FSHR (follicle stimulant hormone-receptor), GH (cell growth), and EGF (cell growth, and differentiation)	N.A
Bunel et al., 2014	GV	FSH withdrawals. Follicles from 5mm aspirated by OPU	qPCR and microarray analysis	CYP11A1 (steroidogenesis) NSDHL (cholesterol synthesis) GATM (creatine biosynthesis), MAN1A1 (functional gap junction-mediated communication), VNN1 (oxidative stress response), NRP1 (angiogenesis), TGFB1 (cell growth and differentiation)	N.A
Bunel et al., 2015	GV	3 cell arrest and oocyte fate	qPCR and microarray analysis	GATM (posttranslational modification, amino acid metabolism, and free radical scavenging)	AGPAT9 (lipid metabolism), CLIC3 (chloride ion concentration control, cell volume regulation, and apoptosis), KRT8 (cellular assembly and organization, apoptosis)
Xiong et al, 2019	GV	maturation outcome and oocyte fate	RNA seq	CCND1, BMP15, GDF9, H19, KLF4, GPC1, SYCP3, and CTSB (cell cycle, meiosis, cell signaling, metabolism, and apoptosis)	N.A
Kussano etal., 2015	GV	follicle size and oocyte fate	qPCR	GPC4 (regulation of growth factors, adhesion, signaling, pro- liferation, and differentiation)	N.A
Khurchabilig et al., 2020	GV	COCs morphology and oocyte fate	qPCR	N.A	FSHR, IGF1R, CYP11al and HSD3β (cell growth, cell differentiation, steroidogenesis)
Melo et al., 2016	GV	follicle size (>8 mm vs <3mm)	qPCR and microarray analysis	FGF11 (cell growth, and differentiation), IGFBP4 and SPRY1 (Cell cylce, DNA repair)	ARHGAP22, COL18A1 and GPC4 (cell cycle, signaling)
Assidi et al., 2010	GV	Granulosa collected 2h before and 6 h after LH surge	qPCR and microarray analysis	TNFAIP6, HAS2, HSD3B2, PLOD2, CHSY1 (differentiation, cell growth, protein transalation, apoptosis-related, lipid and glucose metabolism, ECM formation)	ENO1, DNAJB6, GJA1, SYNPO, ZNF330, MYO1D (Protein synthesis Cellular movement, Cell signaling, Molecular transport, Nucleic acid metabolism)
Assidi et al., 2008	GV	IVM plus FSH or phorbol myristate acetate (PMA) treatment	qPCR and microarray analysis	HAS2, INHBA, EGFR, GREM1, CD44, TNFAIP6, PTGS2, HSP90B1, SERPINE2, PTX3 (differentiation, cell growth, protein transalation, apoptosis, lipid and glucose metabolism, ECM formation)	N.A
Nivet et al., 2013	GV	GC collected after FSH withdrawals	qPCR and microarray analysis	SMAD7, STAT1 (transcription); PRL and GH (cell growth, proliferation); BMPR1B, IGF2, RELN and TFPI2 ( follicle growth); NRP1 (angiogenesis), GFPT2, TF, and VNN1 (oxidative stress response)	KCNJ8 and ANKRD1 (apoptosis and inflammation).
Ashry et al., 2015	GV	BCB staining	qPCR	N.A	CTSB, CTSK, CTSS and CTSZ ( cathepsin family of lysosomal cysteine proteinases)
Bettegowda et al., 2008	GV	Adult vs prepuberal donors	qPCR and microarray analysis	N.A	CTSB, CTSK, CTSS and CTSZ ( cathepsin family of lysosomal cysteine proteinases)
Donnison and Pfeffer 2004	GV	Follicle size (>5 mm vs <2mm)	qPCR and Suppressive Subtractive Hybridization (SSH)	Oct4, Msx1 (transcription factors); Znf198 (TFGb and activin signaling); NDFIP1(post-translational modification); CCNA2 (cell cycle); SLB (stabilization and translation of mRNAs encoding histones)	N.A
Mourot et al., 2006	GV	OPU 6 hr post-LH vs slaughterhouse oocytes after 6 hr IVM	qPCR and microarray analysis	PTTG1, CDC5L, CKS1B, CCNB2 ( cell cycle), PSMB2, PRDX1 (cell metabolism), RGS16 (cell signaling), SKIIP (gene expression), and chromatin support H2A	BMP15, GDF9, CCNB1 and STK6 (follicle-oocyte interaction and cell cycle)
O'Shea et al., 2017	MII	IVM under reduced developmental potential	Western blotting and IF	N.A	ATRX (chromosome alignment, apoptosis, steroid hormone regulated)
PROTEOMIC
Memili et al., 2007	GV	COC morphology and follicle size (>2 mm to 8 mm)	2-DLCMS2	4395 proteins were expressed in the CC. 858 proteins were common to both the CC and the oocytes.	N.A
Walter et al., 2020	MII	Matured in vivo vs in vitro conditions	MALDIT TOF	KEGG pathways of the complement and coagulation cascade, ECM-receptor interactions, steroid biosynthesis, glucose and carbohydrate metabolism	N.A
Peddinti et al., 2010	GV	COC morphology and follicle size (>2 mm to 8 mm)	2-DLCMS2	Integrin signaling, Actin cytoskeleton signaling, Ephrin receptor signaling, PI3K signaling, MAPK signaling	N.A
*NA= not available
